# Supplementary material for: Wound Dressing Selection Is Critical to Enhance Platelet-Rich Fibrin Activities in Wound Care
Source: MDPI journal article supplement (doi:10.3390/ijms21020624), 2020-01-17
Supplement: s1 [file s1]

## SUPPLEMENTARY MATERIALS

**Table 1.** Dressing Products, composition and main properties.

| Type of dressing    | Composition                                                             | Main properties                                                                                                                                          | Commercially available, (Manufacturer)   |
|---------------------|-------------------------------------------------------------------------|----------------------------------------------------------------------------------------------------------------------------------------------------------|------------------------------------------|
| <b>FILM</b>         | Transparent film dressing, polyurethane film                            | Adherent, permeable to water vapor, oxygen and carbon dioxide, impermeable to bacteria and water                                                         | Tegaderm™ Film (3M Helath Care)          |
| <b>FOAM</b>         | Trilaminar structure containing polyurethane, PEG, silicone             | Moderately absorbent, fluid retention, semi-occlusive, insulating, permeable to water and gas                                                            | Mepillex® Border (Mölnlycke Health Care) |
| <b>HYDROCOLLOID</b> | Hydrocolloid (CMC, pectin, gelatin) Polyurethane waterproof outer layer | Absorbs exudates and swells into a hydrophilic gel, fluid trapping, keeps wound moist, occlusive, long-time between changes, promotes granulation tissue | Varihesive® Gel Control (ConvaTec Ltd)   |
| <b>HYDROFIBER</b>   | CMC fibers                                                              | Highly absorbent, forms a gel inside wound bed, keeps wound moist, traps microbes inside the gel                                                         | Aquacel™ extra™ (ConvaTec Ltd)           |
| <b>ALGINATE</b>     | Alginic acid, nonwoven fibers covered with Ca <sup>2+</sup>             | Highly absorbent, forms a hydrophilic gel inside wound bed, keeps wound moist, hemostatic through Ca <sup>+2</sup> release                               | Melgisorb® plus (Mölnlycke Health Care)  |
| <b>MESH</b>         | Flexible polyester with Ag <sup>+</sup> nanocrystals                    | Low adherence, bactericide, sustained Ag <sup>+</sup> release                                                                                            | Acticoat® Flex 3 (Smith&Nephew)          |
| <b>GAUZE</b>        | Gauze - 100% nonwoven synthetic fiber (polyester)                       | Hydrophilic, absorbent, inexpensive                                                                                                                      | Texpla® (Texpol)                         |
